## Cell type specific information transfer for sparse coding

Fleur Zeldenrust\*, Niccolò Calcini\*#, Xuan Yan, Ate Bijlsma@, Tansu Celikel

Department of Neurophysiology, Donders Institute for Brain, Cognition, and Behaviour,  
Radboud University, Nijmegen - the Netherlands

# Current address: Department for BioMedical Research, Universität Bern, Switzerland

@Current address: Departement Population Health Sciences / Department of Biology, Universiteit  
Utrecht, the Netherlands

\* denotes equal contribution.

Correspondence should be addressed to [f.zeldenrust@neurophysiology.nl](mailto:f.zeldenrust@neurophysiology.nl)

### Abstract

Sensory neurons reconstruct the world from action potentials (spikes) impinging on them. Recent work argues that the formation of sensory representations are cell-type specific, as excitatory and inhibitory neurons use complementary information available in spike trains to represent sensory stimuli. Here, by measuring the mutual information between synaptic input and spike trains, we show that inhibitory and excitatory neurons in the barrel cortex transfer information differently: excitatory neurons show strong threshold adaptation and a reduction of intracellular information transfer with increasing firing rates. Inhibitory neurons, on the other hand, show threshold behaviour that facilitates broadband information transfer. We propose that cell-type specific intracellular information transfer is the rate-limiting step for neuronal communication across synaptically coupled networks. Ultimately, at high firing rates, the reduction of information transfer by excitatory neurons and its facilitation by inhibitory neurons together provides a mechanism for sparse coding and information compression in cortical networks.

### Introduction

The intracellular computation from synaptic input to action potential shows a strong compression (Huang et al., 2020). Even though the spike train of a single neuron contains only limited stimulus information, the full stimulus information can be recovered using the spike trains of a small population of (tens) of neurons. How many neurons are needed for full information recovery depends on a combination of the type of code the presynaptic neurons use (rate or timing) and on whether spike trains from interneurons or pyramidal cells are used. So the *decoding* of neural spike trains depends critically on how they were *encoded*.

33 Cortical excitatory pyramidal cells and inhibitory interneurons encode different features of input stimuli.  
34 For instance, excitatory neurons respond to sensory evoked stimuli by sparse, unreliable and selective spike  
35 trains (Murray and Keller, 2011; Reyes-Puerta et al., 2015) and have narrower receptive fields (Bruno and  
36 Simons, 2002; Wu et al., 2008) compared to interneurons. This is a result of differences in both connectivity  
37 (for recent reviews, see (Griffen, 2014; Hofer et al., 2011; Isaacson and Scanziani, 2011; Markram et al.,  
38 2004; Wu et al., 2011) and intrinsic biophysical properties (Cardin et al., 2007; Nowak et al., 2008). Indeed,  
39 most cortical pyramidal cells have broader subthreshold receptive fields than spiking receptive fields (Tan  
40 et al., 2011), which is the result of a combination of both local inhibition and the spike threshold ('iceberg  
41 effect' (Priebe and Ferster, 2008; Rose and Blakemore, 1974)), suggesting an important role for the spike  
42 threshold in shaping receptive fields. This raises the question: what are the differences in the spike-  
43 generating process between cortical interneurons and pyramidal cells, and how does this result in  
44 differences in information encoding?

45  
46 We measured the information encoding properties of pyramidal cells and interneurons in L2/3 of the mouse  
47 barrel cortex. We chose a combination of *ex-vivo* experiments (da Silva Lantyer et al., 2018) and  
48 computational modelling to unravel both the threshold behaviour and the information encoding properties  
49 of excitatory and inhibitory neurons, using a recently developed method to estimate the mutual information  
50 between input and output in an *ex-vivo* setup (Zeldenrust et al., 2017). In *vivo*, excitatory neurons are shown  
51 to have a high action potential threshold (Crochet et al., 2011) and high selectivity (Ranjbar-Slamloo and  
52 Arabzadeh, 2019). Here, we investigated the underlying neural mechanisms. We found that excitatory  
53 neurons show strong threshold adaptation, making them fire sparsely and resulting in a strong compression  
54 of information between input and output. Inhibitory neurons on the other hand have a threshold behaviour  
55 that favours fast-spiking, resulting in a higher information rate transferred through higher spike frequencies,  
56 possibly having a gating role in information transfer.

## 57 **Results**

### 58 *Information transfer in inhibitory and excitatory neurons*

#### 59 Excitatory neurons show strong adaptation

60 Whole-cell recordings were made from pyramidal cells and interneurons in layer 2/3 (L2/3) of mouse barrel  
61 cortical slices (da Silva Lantyer et al., 2018). Cells were classified as either 'excitatory' or 'inhibitory' based  
62 on their electrophysiological responses to a standard current-step protocol (Fig. 1, see Materials &  
63 Methods). In response to depolarizing steps, excitatory neurons show strong spike-frequency adaptation,

64 limiting their maximum firing rate (Fig 1F and Supplementary Table S1), whereas inhibitory neurons can  
65 fire at much higher rates. To measure the information transfer in the spike-generating process, we used a  
66 recently developed method (Zeldenrust et al., 2017) that uses the output of an artificial neural network  
67 (ANN) to generate the frozen noise current input used in our *ex-vivo* experiments. The ANN responds to a  
68 randomly appearing and disappearing preferred stimulus or 'hidden state' (Markov process). The mutual  
69 information between the input current and the hidden state depends on three properties of the ANN: the  
70 number of neurons (N), the average firing rate of the neurons ( $r$ ) and the time constant of the hidden state  
71 ( $\tau$ ). Because of the differences in adaptation and maximum firing rate between the excitatory and inhibitory  
72 cells, it was not possible to use the exact same frozen noise input current for the two cell types:  $\tau$  had to be  
73 long for the excitatory neurons (neurons firing at a low rate cannot transfer information about a fast-  
74 switching stimulus), but this is not the case for the inhibitory neurons. However, the *information* in the  
75 input could be kept constant (Fig 2). We used the parameters in table 1 in the frozen noise experiments to  
76 generate the input currents shown in Fig. 2.

77

| Parameter                                      | Excitatory cells                           | Inhibitory cells                           |
|------------------------------------------------|--------------------------------------------|--------------------------------------------|
| Number of artificial neurons N                 | 1000                                       | 1000                                       |
| Hidden state time constant $\tau$              | 250 ms                                     | 50 ms                                      |
| Average firing rate artificial neurons $\mu_q$ | 0.1 Hz                                     | 0.5 Hz                                     |
| Baseline input current                         | (set so the cell was at -70 mV, see Fig 2) | (set so the cell was at -70 mV, see Fig 2) |
| Amplitude input current                        | 2100 pA                                    | 700 pA                                     |
| Analysis window size                           | 100 s                                      | 20 s                                       |

78 **Table 1:** Parameters of the input in the frozen noise experiments.

79

80 Inhibitory neurons show broadband information transfer; Pyramidal cells transfer less information and at  
81 low frequencies

82 The information transfer of the spike-generating process of a single neuron can be estimated by calculating  
83 the mutual information between the spike train and the hidden state used for generating the input current  
84 (see Materials & Methods). More specifically, we define the fraction of transferred information (FI) as the  
85 mutual information between the spike train and the hidden state divided by the mutual information (MI)  
86 between the input current and the hidden state:

87

$$FI = \frac{MI_{\text{spike train}}}{MI_{\text{input current}}}. \quad (1)$$

88

89 FI quantifies how much information about the hidden state is transferred from the input current to the spike  
90 train, and thus quantifies which fraction of the information is kept during the spike-generating process. In  
91 Fig 3A we show FI as a function of the firing rate  $r$ , for inhibitory (blue) and excitatory (red) neurons, and  
92 compare it to the FI obtained from the optimised 'Bayesian neuron' (BN) model (Deneve, 2008) with the  
93 same parameters (see Materials & Methods) as for the input generated for the excitatory neurons (pink) or  
94 inhibitory neurons (turquoise). Pyramidal cells transfer more information at low firing rates ( $< \sim 8$  Hz)  
95 compared to interneurons. This is due to our choice of slower switching speed of the hidden state for  
96 excitatory neurons: a fast-switching hidden state cannot be properly tracked by neurons firing at a low firing  
97 rate (see also (Zeldenrust et al., 2017)). To compare inhibitory and excitatory neurons, we plotted FI as a  
98 function of the normalized firing rate  $r_n = r \cdot \tau$  (unitless, Fig 3B) and fitted the measured values up to  $r_n =$   
99 1.5 to a saturating function:

$$FI = a \left( \frac{2}{1 + e^{-br_n}} - 1 \right), \quad (2)$$

100

101

102 where  $a$  is the saturation value and  $b$  is the rate with which this the saturation value  $a$  is reached (both  
103 unitless). In Fig. 3E and F the fit values and their 95% confidence intervals are shown. Inhibitory  
104 experimental and BN values saturate around similar values ( $a = 0.65$  (0.64 - 0.66) and  $a = 0.64$  (0.63 -  
105 0.65) respectively), with experiments having a slightly lower rate ( $b = 5.8$  (5.6 - 6.0) and 7.7 (7.3 - 8.0)).  
106 Excitatory neurons saturate at lower experimental values ( $a = 0.51$  (0.48 - 0.54)) and slightly lower BN  
107 values ( $a = 0.58$  (0.54 - 0.63)), and the saturation rates are also lower ( $b = 4.5$  (4.0 - 4.9) and  $b = 6.1$  (5.0  
108 - 7.2) respectively). This shows that in the case of the excitatory neurons, the experimental spike trains  
109 transmit much less information than the spike trains of the BN, whereas in the inhibitory case the model  
110 and experimental spike trains perform similarly. As a control, we presented the input for the excitatory  
111 neurons also to inhibitory neurons (Fig. 3, green,  $a = 0.63$  (0.52 - 0.75),  $b = 2.6$  (1.6 - 3.7)); these inhibitory  
112 neurons fired at a higher normalized rate (Fig. 3C) and performed better than the excitatory neurons.

### 113 Inhibitory neurons transfer information more efficiently

114 To compare the efficiency of the pyramidal cells, the interneurons and the BN discussed above, we defined  
115 the (unitless) efficiency  $E$  as the fraction of information divided by the normalized firing rate (i.e. the firing  
116 rate relative to the switching speed of the hidden state):

$$117 \quad E = \frac{FI}{r \cdot \tau}. \quad (3)$$

118 This efficiency is shown as a function of the firing rate in Fig 4A and of the normalized firing rate in Fig  
119 4B. If the fraction of information FI depends exponentially on the normalized firing rate, such as in Fig.  
120 3B, the efficiency decreases as a function of the (normalized) firing rate (note that for very low firing rates  
121 the mutual information and hence the efficiency cannot be calculated reliably, due to the lack of spikes). In  
122 Fig 4B, the theoretical values for the fitted curves from Fig 3B and their inflection points (squares) are also  
123 shown (lines with circular black-lined markers). These curves have a limit value for a vanishing normalized  
124 firing rate at  $E=ab/2$ . With increasing (normalized) firing rate, the efficiency decreases. The inflection  
125 points of the theoretical curves are indicated by black-lined squares. Note that the model BN curves  
126 (turquoise for inhibitory neurons and pink for excitatory neurons) have higher efficiency values than their  
127 experimental counterparts, indicating that the BN model is indeed optimal in the sense that it sets an upper  
128 limit to the efficiency. The inhibitory experimental values are much closer to their BN counterparts than  
129 the excitatory experimental values to their BN counterparts, indicating that the inhibitory neurons are more  
130 efficient. However, when the interneurons respond to the slow-switching input made for the excitatory  
131 neurons (green markers), they perform similarly or even less efficiently than the excitatory neurons (red  
132 markers). Therefore, interneurons are more efficient than excitatory neurons at transferring information  
133 from the fast-switching stimulus, but not from the slow-switching stimulus.

### 134 Inhibitory neurons perform well as classifiers

135 The setup with the hidden state made it possible to show 'receiver-operator curves' (ROCs): we defined a  
136 'hit' as a period during which the hidden state was 1 (up-state), in which at least 1 action potential was fired,  
137 and a 'miss' as an up-state in which no action potentials were fired. Similarly, we defined a 'false alarm' as  
138 a period during which the hidden state was 0 (down-state), in which at least 1 action potential was fired,  
139 and a 'correct reject' as a down state in which no action potentials were fired. We then defined the 'hit  
140 fraction' as the number of hits divided by the total number of up-states, and similarly the false alarm fraction  
141 for the number of false alarms divided by the total number of down-states. In Fig. 5A the results are shown,  
142 for the same five conditions as discussed above. For each experiment, a control experiment was simulated  
143 by generating a Poisson spike train with the same number of spikes as the original experiment. Note that

144 this 'control' is below the line hit fraction = false alarm fraction, because the hidden state is more often 0  
145 than 1 ( $P_1 = \frac{1}{3}$ ). Since the hidden state is longer in the '0' state, the probability that a random spike occurs  
146 when the hidden state equals 0 is higher, hence the probability for a false alarm is higher than the probability  
147 for a hit.

148  
149 Interneurons perform very similarly to the BN, as shown in Fig. 5, whereas the pyramidal cells perform  
150 less optimal than their model counterparts. We performed control experiments where input currents  
151 generated for excitatory neurons were injected into inhibitory neurons, (green triangles in Fig. 4 and 5).  
152 The results suggest that interneurons perform comparably to (on the same curve as) pyramidal cells, but  
153 with a lower discrimination threshold (i.e. with a higher firing rate), which is in agreement with our previous  
154 observation that interneurons responded with a higher firing rate than pyramidal cells. Note that inhibitory  
155 neurons fired slightly less spikes during the up-states (Fig. 5B) and the normalized firing rate in the up-  
156 state somewhat lower for the inhibitory neurons (Fig. 5F). Since the excitatory neurons fire more spikes  
157 during the down states (Fig. 5C and G), this corresponds to a lower efficiency for excitatory neurons (Fig.  
158 4) and a worse performance on the binary classification task (Fig. 5A). Indeed, the number of spikes per  
159 down state (Fig. 5C) and normalized firing rate in the down state (Fig. 5G) differed between inhibitory and  
160 excitatory neurons (Supplementary Tables S2 and S3). Note that most 'incorrect' spikes are actually fired  
161 shortly after a down switch (Fig 5 H-K), so they might be 'correct' spikes that were a few milliseconds too  
162 late.

163  
164 Interestingly, for large firing rates the experiments appear to outperform the model. This appears  
165 paradoxical, since the BN is an optimal model for the stimulus. However, the BN is an optimal model given  
166 a certain set of assumptions, one of which is the form of adaptation it uses: the BN increases its firing  
167 threshold each time a spike is fired, so that it only fires when this transfers 'new information' (Deneve,  
168 2008). The neurons we recorded might use other forms of adaptation, that are less efficient (i.e. they use  
169 more spikes to transmit less information, see Figs 3 and 4), but apparently also less prone to false alarms.

## 170 Pyramidal cells show diverse response properties

171  
172 The information transfer, efficiency and ROC curves (Figs 3-5) show that inhibitory neurons transfer  
173 information more efficiently. They are close to optimal in transferring information about the hidden state  
174 (i.e. it shows *how much* information these neurons transfer, but not *what* features they respond to). In Fig.  
175 6 we show the normalized spike-triggered averages (STAs) for spikes of inhibitory neurons (A and E) and  
176 excitatory neurons (C). The filter was whitened and regularized (see Materials & Methods). Next, the

177 projection values of spike-triggering and random currents were calculated (Figs 6B for an example for 1  
178 cell), and the distance between the means of the distributions for random and spike-triggering currents was  
179 calculated for each cell (Figs 6D).

180

181 The average STAs for all inhibitory (Fig 6A, blue) and excitatory (Fig 6C, red) neurons were quite similar,  
182 but the traces for individual neurons (grey lines) were much more variable for excitatory neurons than  
183 inhibitory neurons. This could indicate that the excitatory neurons have a higher variance in their feature  
184 selectivity of incoming current stimuli than inhibitory neurons, but it is also possible that this is an effect  
185 of the lower number of spikes available for excitatory neurons. To control for this possibility, we calculated  
186 the STAs for spike trains of inhibitory neurons, where the number of spikes was reduced to match an  
187 excitatory trial (Fig 6E, brown). For all three groups (inhibitory, excitatory and inhibitory control spike  
188 trains) we calculated the inner product between all calculated STAs. Fig 6F shows the distributions of these  
189 inner products, and it is clear that both inhibitory full and control spike trains are much less *variable* (inner  
190 product closer to 1) than the excitatory spike trains (two-sample Kolmogorov-Smirnov test E-I  $p=0$ , E-C  
191  $p<1e-223$ , I-C  $p<1e-228$ ). The distribution of all distances between the means is shown in Figs 6D. The  
192 distances between the distributions, measured in standard deviations of the prior (random triggered  
193 currents) distribution, are much higher for excitatory neurons than for inhibitory neurons, indicating that  
194 excitatory neurons are more *selective* (p-values two-sample t-test: E-I  $p<1e-28$ , E-C  $p<1e-24$ , I-C  $p=0.14$ ).

195

196 In conclusion, pyramidal cells fire less and are therefore more selective, but at the same time there is more  
197 variability between excitatory neurons in what input features they respond to. Excitatory neurons transfer  
198 information mainly at low frequencies, whereas interneurons transfer more information in a broadband  
199 spectrum and are more uniform with respect to the input features they respond to. Recently, we have shown  
200 (Huang et al., 2016) that the threshold behaviour of neurons is a crucial factor in their information  
201 processing. Therefore, in the next section the spike threshold behaviour of the excitatory and inhibitory  
202 neurons was investigated.

### 203 ***Threshold dynamics in inhibitory and excitatory neurons***

#### 204 Dynamic threshold of both neuron types

205 In Fig 7, we show the threshold behaviour of the inhibitory and excitatory neurons. The membrane potential  
206 threshold of each spike was determined based on the method of Fontaine et al. (2014) (see Materials &  
207 Methods). We show the distribution of the membrane potential as a function of the inter-spike interval (ISI,  
208 Fig. 7A and E). For both inhibitory and excitatory neurons, the membrane potential threshold goes up with



209 short ISIs, as expected, and for long ISIs the threshold is low. This effect has a long time scale (at least  
210 several tens of milliseconds), longer than expected based on the relative refractory period alone (typically  
211 less than ten milliseconds). The threshold for excitatory neurons is almost 10 mV higher than for inhibitory  
212 neurons (Fig 7A,E,G,H). Next to the ISI, the threshold also depended on the history of the membrane  
213 potential (Fig 7C,F): we calculated the regression between the action potential threshold and the average  
214 membrane potential in different windows preceding the spike. There is a strong correlation between the  
215 threshold and the membrane potential immediately preceding the spike for both neuron types, which  
216 reduces gradually with time before the spike. However, for both neuron types some relation between  
217 membrane potential and threshold is still visible several tens of milliseconds before the spike. The current  
218 clamp step protocol (Fig 7 G-J) confirms the overall higher threshold for excitatory neurons (Fig 7G, H)  
219 and strong spike-frequency adaptation (Fig 7 J) for excitatory neurons. The threshold adaptation rate  
220 however, shows significant differences between fast spiking and regular spiking neurons at current injection  
221 intensities ranging from +240 to +320pA, while they do not show significant changes at lower or higher  
222 intensities, possibly due to low firing rates or to reaching a steady state firing rate. (Fig 7J, table S1).

223

224 So in conclusion, both inhibitory and excitatory neurons show dynamic threshold behaviour, with  
225 interneurons having much lower thresholds, so they can fire at high rates, whereas the dynamic threshold  
226 of excitatory neurons promotes low-frequency firing and adaptation.

### 227 Voltage clamp experiments show a narrow sodium channel activation in inhibitory cells

228 To investigate the activation mechanism of excitatory and inhibitory cells, we performed voltage clamp  
229 experiments on a separate group of cells from the same area. We performed a sawtooth-protocol (Fig 8, A-  
230 C), in which the clamped membrane potential of the cells was linearly switched from -70 mV to 70 mV in  
231 100 ms (Fig 8, left column), 50 ms (Fig 8, middle column) or 10 ms (Fig 8, right column). In response to  
232 such a rapidly changing membrane potential, the neuron generated current peaks (Fig. 8, A-C), which were  
233 abolished in control experiments with TTX application (Supplementary Fig S3), suggesting these are  
234 caused by sodium channel activation. We quantified the amplitude (not displayed), half-width (Fig S3, D-  
235 F), peak onset and offset duration (Fig 8, G-I and J-L respectively), adaptation of the amplitude of the 1st  
236 peak over consecutive voltage ramps (Fig 8, M-O) of the first of these peaks. The only significant, consistent  
237 and relevant difference we observed with this protocol between the inhibitory and excitatory neurons was  
238 in the half width of the first peak, which was strongly reduced in inhibitory neurons (Fig 8, D-F). By  
239 separating the half-width in onset and offset the difference remains in both measures, but interestingly the  
240 regular spiking neurons seem to be split into two different groups. Moreover, in this cell type the amplitude  
241 of the first peak was reduced in amplitude over consecutive sawtooths (Fig 8, M-O).



## 242 Discussion

243 Postsynaptic information processing requires decoding information from presynaptic action potentials. In  
244 an accompanying (Huang et al., 2020) paper we have shown that excitatory and inhibitory neurons *decode*  
245 spike-timing and firing rate information differentially. In particular, we found that when a ‘Rate+Poisson’  
246 *encoding* paradigm was used, the spike trains of inhibitory neurons contain more stimulus information than  
247 the spike trains of excitatory neurons. However, whether the two neuronal classes *encode* information  
248 differently is not known. In this paper we have addressed this question by quantifying the internal  
249 information loss between input current and output spike train in *ex-vivo* current clamp experiments. We  
250 used a stimulus that is comparable to the ‘Rate+Poisson’ coding scheme: the input current was generated  
251 by an Artificial Neural Net (ANN), where each cell fires Poisson spike trains of which the firing rate is  
252 modulated by the absence or presence of the stimulus (Zeldenrust et al., 2017). As predicted in (Huang et  
253 al., 2020), we found that excitatory neurons transfer information at limited rates whereas inhibitory neurons  
254 transfer more information and at much higher rates. So excitatory cells show a stronger compression and  
255 are therefore more selective. Moreover, they show a strong variability in their response properties over the  
256 population. Interneurons on the other hand, show a near-optimal response, transferring much information  
257 about the input at relatively high rates. They are more uniform in the features they respond to and are more  
258 efficient at transferring information. These differences in information transfer between inhibitory and  
259 excitatory neurons are accompanied by a different threshold behaviour: excitatory cells show strong  
260 threshold adaptation, keeping their firing rates low, whereas interneurons have a lower threshold and can  
261 fire and transfer information at much higher rates.

262  
263 The observed differences between inhibitory and excitatory neurons in threshold behaviour and information  
264 transfer can be partially explained by differences in the sodium activation profile. We observed a clear  
265 difference in activation peak width between inhibitory and excitatory neurons, but not in the activation  
266 voltage. Moreover, the amplitude of these peaks adapted strongly for excitatory, but not for inhibitory  
267 neurons. This suggests that the main differences in threshold behaviour between inhibitory and excitatory  
268 neurons might not so much be explained by the initial sodium activation, but by what happens right after  
269 it: sodium inactivation and the activation of repolarizing currents. The high threshold we observed in  
270 interneurons could be the result of an interplay between the sodium current and a fast potassium current  
271 that promotes the de-inactivation of the sodium channels. For instance, Kv3 potassium channels only occur  
272 in fast-spiking cells (Erisir et al., 1999; Grissmer et al., 1994; Rowan et al., 2016, 2014; Rudy and McBain,  
273 2001), suggesting a link between threshold facilitation and these potassium channels). Other candidates  
274 include sodium- and/or calcium-activated potassium channels (Sanchez-Vives et al., 2000), that have been  
275 shown to cause spike-frequency adaptation and after-hyperpolarizations. However, the exact interplay

276 between the spike history, the synaptic input and the spike threshold is complex, depending next to the  
277 intrinsic channel properties on for instance the axon initial segment location (for a review, see (Kole and  
278 Stuart, 2012)).

279

280 Neurons in the sensory cortices process information coming from the periphery by giving complex, non-  
281 linear spike responses to incoming stimuli (Koch and Segev, 2000). These responses are shaped by each  
282 neuron's place in the network (i.e. the connectivity of the network, (Harris and Mrsic-Flogel, 2013; Hofer  
283 et al., 2011; Ko et al., 2013, 2011; Okun et al., 2015)) and by its biophysical properties (i.e. which ion  
284 channels are expressed in its membrane). Cortical networks consist of excitatory pyramidal cells and  
285 inhibitory interneurons, two groups that differ from one another both in their connectivity (for recent  
286 reviews, see (Hofer et al., 2011; Markram et al., 2004) ) and their intrinsic biophysical properties (for a  
287 recent review, see (Griffen, 2014)). The differences between the two groups of cells result in different  
288 responses to sensory stimuli (Murray and Keller, 2011), but to what extent these differences can be  
289 attributed to the differences in network structure or to the differences in single neuron properties remains  
290 an open question. For instance, the recent results of (Reyes-Puerta et al., 2015), who found using  
291 simultaneous recordings in rat barrel cortex that the spike trains of interneurons contained more stimulus-  
292 related information than those of pyramidal cells, could be the result of intrinsic neuronal properties,  
293 network connectivity differences between inhibitory and excitatory neurons, differences in adaptation, and  
294 so on. We show here that at least part of the observed differences between the response properties of  
295 inhibitory and excitatory neurons in layer 2/3 of the mouse barrel cortex can be explained by intrinsic  
296 neuronal properties, next to network properties.

297

298 Neurons in the cortex react to prolonged or repeated stimuli with a spike response that decreases in  
299 frequency over time, an effect called spike-frequency adaptation (Gutkin and Zeldenrust, 2014). This  
300 adaptation can be the result of a hyperpolarization of the membrane potential (for instance due to the  
301 activation of an outward current (Sanchez-Vives et al., 2000), an increase in threshold (Azouz and Gray,  
302 2000), or both. It has been repeatedly shown that such adaptation is an essential part of the functioning of  
303 cortical neurons, and any model of cortical firing should include such adaptation (Brette and Gerstner, 2005;  
304 Fontaine et al., 2014; Gerstner and Naud, 2009; Jolivet et al., 2004; Rauch et al., 2003; Rossant et al., 2011).  
305 However, the functional implications of different forms of adaptation are still largely unknown. Here, we  
306 associated the functional implications of threshold adaptation with the information processing capability of  
307 inhibitory interneurons and excitatory pyramidal cells, which show very different forms of threshold  
308 behaviour.

309

310 Measuring the information transfer of neurons in an *ex-vivo* setup traditionally uses variations on one of  
311 two methods: 1) the 'direct method' (de Ruyter van Steveninck et al., 1997; Strong et al., 1998), in which a  
312 frozen-noise stimulus is repeated many times to estimate the signal-to-noise ratio, or 2) using long frozen  
313 noise stimuli to fit a reverse correlation model and estimate the mutual information between input and  
314 output from how well this model can predict the input (Bialek et al., 1991; de Ruyter van Steveninck and  
315 Bialek, 1988; Rieke et al., 1997). However, both these methods need long recordings (~1 hour) for a single  
316 estimate of the mutual information between the input current and the output spike train. Such long recording  
317 times are often not feasible for *ex-vivo* experiments, especially if different conditions need to be compared.  
318 Therefore, we used a recently developed method to measure the information transfer between input current  
319 and output spike train in *ex-vivo* experiments that can estimate the mutual information in recordings of tens  
320 to hundreds of seconds (Zeldenrust et al., 2017). In this method, the input current used in a current-clamp  
321 setup is the simulated output of an artificial neural network (ANN) that responds to a randomly appearing  
322 and disappearing preferred stimulus or 'hidden state' (Markov process). The information in the input can be  
323 explicitly controlled by varying the number of spikes of the ANN (the number of neurons and their firing  
324 rates) and the switching speed of the hidden state. In this method, all data can be used for the estimation of  
325 the mutual information, and trial repetition or model fitting is not necessary, making the required length of  
326 the recording much shorter. One assumption of the information method is that the output spike trains  
327 generated by the clamped neurons are (approximately) Poissonian. In Supplementary Fig. S5 it can be seen  
328 that there are slightly more spike doublets than expected from a Poisson process, but that there is otherwise  
329 no clear structure in the spike trains.

330  
331 At the local network level, full stimulus information is preserved at the presynaptic level and in small groups  
332 of neurons (Huang et al., 2020). However, that does not mean that the full information is transferred to the  
333 next processing level. The fact that excitatory neurons, the neurons that connect not only locally but also  
334 across layers and areas, are more selective, as well as more variable in what stimulus features they represent,  
335 suggest that the network performs both a form of information compression and transformation. Moreover,  
336 (Huang et al., 2016) showed that an adaptive threshold model neuron is more informative for high temporal  
337 precision and low noise than a fixed threshold model neuron, suggesting that especially noisy stimuli with  
338 low temporal precision are suppressed. So the relation between threshold adaptation and information  
339 processing is very strong. The functional reason for this, remains an open topic. One theory suggests that  
340 such fast inhibition is needed for predictive coding (Boerlin et al., 2013; Denève and Machens, 2016;  
341 Hawkins and Ahmad, 2017; Zeldenrust et al., 2019). In addition to this, we suggest that the observed  
342 compression of excitatory neurons and the broadband information transfer of inhibitory neurons serve a  
343 common goal: sparse coding (Földiák, 1990; Foldiak and Endres, 2008; Olshausen and Field, 1996). In

344 vivo, the activity of neurons in barrel cortex is shown to be extremely sparse, with very narrow receptive  
345 fields (Ranjbar-Slamloo and Arabzadeh, 2019), possibly due to a large distance between the resting  
346 membrane potential and neural threshold in excitatory neurons (Crochet et al., 2011). Here, we show two  
347 underlying neural mechanisms that collaborate towards this sparse coding: strong threshold adaptation that  
348 compresses information in excitatory neurons and high activity levels in inhibitory neurons with little or no  
349 compression. Together, these mechanisms effectively 'gate' the message to the next processing layer,  
350 resulting in a specific and sparse code.

351

## 352 **Materials & Methods**

### 353 *Experiments*

354 All current clamp data can be found in this repository: <https://doi.org/10.34973/4f3k-1s63>. The voltage  
355 clamp data are part of the dataset of da Silva Lantyer et al. (2018).

### 356 Ethics statement.

357 Animals used were Pval-cre and SSt-cre mice from 9 to 45 weeks kept with unlimited access to water and  
358 food, housed in a 12 hour light/dark cycle. All experimental procedures were performed according to Dutch  
359 law and approved by the Ethical Committee for Animal Experimentation of Radboud University (RU DEC).  
360 Each mouse was perfused with iced and oxygenated (95% O<sub>2</sub>/5% CO<sub>2</sub>) Slicing Medium (composition in  
361 mM: 108 ChCl, 3 KCl, 26 NaHCO<sub>3</sub>, 1.25 NaH<sub>2</sub>PO<sub>4</sub>.H<sub>2</sub>O, 25 Glucose.H<sub>2</sub>O, 1 CaCl<sub>2</sub>.2H<sub>2</sub>O, 6 MgSO<sub>4</sub>.7H<sub>2</sub>O,  
362 3 Na-Pyruvaat) under anaesthesia with 1,5ml Isoflurane inhaled for 2 minutes.

### 363 Slice electrophysiology

364 The brain was covered in 2% agarose and submerged in Slicing Medium after which it was sliced in  
365 300 µm thickness using a VF-300 compresstome (Precisionary Instruments LLC) and then incubated for  
366 30 min in 37°C artificial cerebrospinal fluid (ACSF, composition in mM: 1200 NaCl, 35 KCL, 13  
367 MgSO<sub>4</sub>.7H<sub>2</sub>O, 25 CaCl<sub>2</sub>.2H<sub>2</sub>O, 100 Glucose.H<sub>2</sub>O, 12.5 NaH<sub>2</sub>PO<sub>4</sub>.H<sub>2</sub>O, 250 NaHCO<sub>3</sub>), oxygenated  
368 (95% O<sub>2</sub>/5% CO<sub>2</sub>). The heating of the ACSF solution was then stopped and 30m were allowed for the ACSF  
369 bath to reach room temperature. Slices were then kept in this bath until use.

370 Slices were placed into the recording chamber under the microscope (Eclipse FN1, Nikon) and  
371 perfused continuously at a rate of 1 ml/min with the oxygenated ACSF at room temperature. Patch pipettes  
372 for whole-cell recordings were pulled from borosilicate glass capillaries, 1.0 mm outer diameter, 0.5mm

373 inner diameter, on a pipette-puller (Sutter Instrument Co. Model P-2000), until an impedance of  $8\pm 2 \text{ M}\Omega$   
374 for the tip was obtained. Pipettes were filled with a solution containing (in mM) *115 CsMeSO<sub>3</sub>, 20 CsCl,*  
375 *10 HEPES, 2.5 MgCl<sub>2</sub>, 4 Na<sub>2</sub>ATP, 0.4 NaGTP, 10 Na-phosphocreatine, 0.6 EGTA, 5 QX-314* (Sigma).

376 The whole cell access was obtained after reaching the GOhm seal and breaking the membrane. Upon  
377 entering the cell and the whole-cell mode, the membrane potential was kept fixed at  $-70\text{mV}$ , outside  
378 stimulation.

### 379 Input current generation

380 Data acquisition was performed with HEKA EPC9 amplifier controlled via HEKA's PatchMaster  
381 software (version 2.90x.2), subsequent analysis with MatLab (Mathworks, v.2016b).

382

383 The current clamp (CC) steps protocol was performed in every cell, and used to distinguish between cell  
384 type, according to the Firing Rate and spike shape. The protocol consisted in clamping the neuron at a  
385 baseline current  $I_{\text{baseline}}$ , corresponding to the one required to keep its membrane at  $-70\text{mV}$ , and providing a  
386  $500\text{ms}$  long stimulus of fixed current value  $I = I_{\text{baseline}} + (40\text{pA} * \text{step number})$ , for a total of 10 steps,  
387 reaching a maximum current injected of  $I_{\text{baseline}} + 400\text{pA}$ . Between each current injection step, a  $5.5\text{s}$   
388 recovery window was allowed.

389

390 To be able to use the method to measure the information transfer (Zeldenrust et al., 2017), the input current  
391 used in the current-clamp experiments is generated as the output of an artificial neural network (ANN) that  
392 responds to a randomly appearing and disappearing preferred stimulus or 'hidden state' (Markov process)  
393  $x$ : a binary variable that can take the values of 1 (preferred stimulus present, 'on-state') and 0 (preferred  
394 stimulus absent, 'off-state'). The Markov process has rates  $r_{\text{on}}$  and  $r_{\text{off}}$ . This corresponds to a switching time

395 constant  $\tau = \frac{1}{r_{\text{on}} + r_{\text{off}}}$ . A time constant  $\tau$  of 50 or 250 ms was used for inhibitory/fast spiking or

396 excitatory/regular spiking neurons respectively, as excitatory neurons did not show a high enough firing  
397 rate to allow for faster time constants. The ANN consists of  $N=1000$  neurons that fire Poisson spike trains,  
398 whose firing rates are modulated by the stimulus so that each neuron fires with rate  $q_{\text{on}}^i$  when  $x = 1$ , and  
399  $q_{\text{off}}^i$  when  $x = 0$ . These rates are drawn from a Gaussian distribution with mean  $\mu_q$  (see Table 1) and

400 standard deviation  $\sigma_q = \sqrt{\frac{1}{8}\mu_q}$ . Each spike was convolved with an exponential kernel with unitary surface

401 and a decay time of  $5\text{ms}$  and the spike trains from different presynaptic neurons contribute to the output

402 with weight  $w_i = \log \frac{q_{\text{on}}^i}{q_{\text{off}}^i}$ .

## 403 *Analysis*

### 404 Cell classification

405 Cells were classified using the following procedure. Before the frozen noise injection, for each cell, the  
406 response to a current-clamp step (CC-step) protocol was recorded. From these recordings, the maximum  
407 firing rate, the average spike-halfwidth and the average after hyperpolarization (AHP) amplitude were  
408 extracted (Fig 1). On-site, the cells were classified by the experimenter based on the firing rate and the  
409 spike width. Based on this initial classification the cell received the frozen noise with either  $\tau = 250$  ms  
410 (excitatory neurons) or  $\tau = 50$  ms (inhibitory neurons).

411 Offline, the initial classification was verified using an agglomerative clustering protocol (MATLAB  
412 'clusterdata') to cluster the data into 2 groups (separated following Ward's method(Ward, 1963)), according  
413 to the maximum firing rate and the average spike-half width (normalized to zero mean and unit standard  
414 deviation) reached during the CC-Step protocol (Fig 1E). Only for a single cell, the initial classification and  
415 the post-hoc classification were in disagreement (Fig 1E, pink star). We decided to keep this cell in the  
416 original (inhibitory) group due to its position between the two clusters.

### 417 Calculation of mutual information

418 The mutual information between the hidden state and the input ( $MI_I$ ) or a spike train ( $MI_{\text{spike train}}$ ) can be  
419 estimated with the help of this hidden state  $x$ . The method is explained in detail in (Zeldenrust et al., 2017)  
420 and follows derivations from (Denève, 2008; Lochmann and Denève, 2008).

421

422 The log-odds ratio  $L$  that the hidden state is 1, given the history of the input until now  $I(t)$  can be estimated  
423 using

$$\frac{\hat{L}}{dt} = r_{\text{on}}(1 - e^{-\hat{L}}) - r_{\text{off}}(1 + e^{\hat{L}}) + I(t) - \theta, \quad (4)$$

424

425 Where  $\theta = \sum_{i=1}^N q_{\text{on}}^i - q_{\text{off}}^i$  is the constant offset of the input, which is chosen to equal 0 here. Using the  
426 log-odds ratio, we can estimate the conditional entropy

$$\hat{H}_{xy} = -\left\langle x \log_2 \left( \frac{1}{1 + e^{-L}} \right) + (1-x) \log_2 \left( 1 - \frac{1}{1 + e^{-L}} \right) \right\rangle_{\text{time}}. \quad (5)$$

427

428 Because the hidden state follows a memoryless Markov process, its entropy at every moment in time can  
 429 be calculated by

$$H_{xx} = -p_1 \log_2(p_1) - (1-p_1) \log_2(1-p_1). \quad (6)$$

430  
 431 Where  $p_1 = \frac{r_{on}}{r_{on}+r_{off}}$  is the prior probability that the hidden state equals 1. With the canonical  $MI = H_{xx} -$   
 432  $H_{xy}$  the mutual information between the input and the hidden state can now be estimated. Similarly, the  
 433 mutual information between a spike train and the hidden state can be estimated by integrating equation (4)  
 434 where the input I is now replaced by

$$I_{\text{spike train}} = w \cdot \rho(t), \quad (7)$$

435  
 436 where  $\rho(t)$  is the spike train of the neuron, and its weight  $w$  is given by

$$w = \frac{\hat{q}_{on}}{\hat{q}_{off}} = \frac{\# \text{ spikes while } x = 1}{\# \text{ spikes while } x = 0} \quad (8)$$

437  
 438 and  $\theta$  is calculated similarly based on the observed  $q_{on}$  and  $q_{off}$ .

### 439 Bayesian neuron

440 The 'Bayesian neuron' (Denève, 2008) is a spiking neuron model that optimally integrates evidence about  
 441 the hidden state from the ANN described above. It is optimal given an efficient coding or redundancy  
 442 reduction assumption: it only generates new spikes if that spikes transfers *new* information about the hidden  
 443 state, that cannot be inferred from the past spikes in the spike train. In practice, the neuron performs a leaky  
 444 integration of the input, in order to calculate the log-odds ratio L for the hidden state being 1:

$$\frac{L}{dt} = r_{on}(1 - e^{-L}) - r_{off}(1 + e^L) + I(t) - \theta, \quad (9)$$

445  
 446 where  $r_{on}$  and  $r_{off}$  are the switching speeds of the hidden state, and  $\theta = \sum_{i=1}^N q_{on}^i - q_{off}^i$  is the constant  
 447 offset of the input, which is chosen to be equal to 0 in this paper. The neuron compares this log-odds ratio  
 448 from the input with the log-odds ratio of its own spiketrain, G:

$$\frac{G}{dt} = r_{on}(1 - e^{-G}) - r_{off}(1 + e^G), \quad (10)$$

449  
 450 which is updated each time a spike is fired:



$$\text{if } L > G + \frac{\eta}{2} \begin{cases} \text{a spike is fired} \\ G \rightarrow G + \eta \end{cases}, \quad (11)$$

451  
452 where  $\eta$  is the only free parameter that describes the distance between the threshold and the reset of the  
453 Bayesian neuron. Note that this neuron model has a form of threshold adaptation: if it did not spike for a  
454 long time,  $G$  decays to its prior value  $G_{prior} = \ln \frac{r_{on}}{r_{off}}$ . With each spike,  $G$  is increased by  $\eta$ , and more input  
455 (larger  $L$ ) is needed to fire a spike.

#### 456 Threshold detection

457 The membrane potential threshold of each spike was determined based on the method of (Fontaine et al.,  
458 2014): in a window of 1 to 0.25 before each spike maximum, the earliest time in the window at which either  
459 the first derivative exceeded 18 mV/ms (i.e. exceeded a value of 0.9 mV for a sampling rate of 20000 Hz)  
460 or the second derivative exceeded 140 mV/ms<sup>2</sup> (i.e. exceeded a value of 0.35 mV for a sampling rate of  
461 20000 Hz) was designated as the threshold-time, and the threshold value was determined as the  
462 corresponding membrane potential.

#### 463 ROC curves

464 We defined a 'hit' as a period during which the hidden state was 1, in which at least 1 action potential was  
465 fired, and a 'miss' as a period during which the hidden state was 1, in which no action potentials were fired.  
466 Similarly, we defined a 'false alarm' as a period during which the hidden state was 0, in which at least 1  
467 action potential was fired, and a 'correct reject' as a period during which the hidden state was 0, in which  
468 no action potentials were fired. So each period in which the hidden state was 1, was either defined as a 'hit'  
469 or a 'miss', and each period in which the hidden state was 0, was either defined as a 'false alarm' or a 'correct  
470 reject'. The total number of hits was divided by the total number of periods during which the hidden state  
471 was 1, which resulted in the fraction of hits  $0 \leq f_h \leq 1$  and similarly for the misses, false alarms and correct  
472 rejects. We calculated the fractions of hits, misses, false alarms and correct rejects for each spike train, as  
473 well as for a corresponding Poisson spike train of the same length and with the same number of spikes.  
474 Note that for these Poisson spike trains, the hit fraction is actually below the hit fraction = false alarm  
475 fraction line, due to the nature of the hidden state: because the hidden state is more often 0 than 1, a random  
476 spike will have a higher chance of being timed during a period where the hidden state equals 0. Therefore,  
477 the false alarm fraction will be higher than the hit fraction for Poisson spike trains.

## 478 Spike-triggered average

479 The whitened and regularized spike-triggered average (STA) was calculated as

$$480 \quad \text{STA} = (X^T X \lambda \mu_{X^T X} I) \setminus (X^T s), \quad (12)$$

481 where  $X$  is a stimulus-lag matrix, where each row is the stimulus vector with a different lag (see  
482 (Chichilnisky, 2001; Paninski, 2003; Sharpee et al., 2004; Simoncelli et al., 2004)),  $X^T X$  is the correlation  
483 matrix and  $I$  is the identity matrix. Parameter  $\lambda$  is the regularization parameter set to 10 and  $\mu_{X^T X}$  is the mean  
484 of the diagonal of the correlation matrix. Finally,  $s$  denotes the spike train. The resulting STA was  
485 normalized with the L2 norm. For each neuron, the inner product of all spike-triggering stimuli was  
486 calculated, as well as the same number of random-triggered stimuli. With the random-triggered stimuli, the  
487 prior distribution of the input could be calculated, and compared to the distribution of spike-triggering  
488 stimuli (the posterior distribution). The difference in mean between the prior and posterior was calculated  
489 for each neuron, and the distribution of means over all neurons is shown in Fig 6.

490

## 491 **Acknowledgements**

492 This work was supported by grants from the European Commission (Horizon2020, nr. 660328), European  
493 Regional Development Fund (MIND, nr. 122035) and the Netherlands Organisation for Scientific Research  
494 (NWO-ALW Open Competition, nr. 824.14.022) to TC and by the Netherlands Organisation for Scientific  
495 Research (NWO Veni Research Grant, nr. 863.150.25) to FZ.

## 496 **References**

- 497 Azouz R, Gray CM. 2000. Dynamic spike threshold reveals a mechanism for synaptic coincidence  
498 detection in cortical neurons in vivo. *Proceedings of the National Academy of Sciences* **97**:8110–  
499 8115. doi:10.1073/pnas.130200797
- 500 Bialek W, Rieke F, de Ruyter van Steveninck RR, Warland D. 1991. Reading a Neural Code. *Science*  
501 **252**:1854–1857.
- 502 Boerlin M, Machens CK, Denève S. 2013. Predictive Coding of Dynamical Variables in Balanced  
503 Spiking Networks. *PLoS Computational Biology* **9**. doi:10.1371/journal.pcbi.1003258
- 504 Brette R, Gerstner W. 2005. Adaptive exponential integrate-and-fire model as an effective description of  
505 neuronal activity. *Journal of neurophysiology* **94**:3637–42. doi:10.1152/jn.00686.2005
- 506 Bruno RM, Simons DJ. 2002. Feedforward mechanisms of excitatory and inhibitory cortical receptive  
507 fields. *The Journal of Neuroscience* **22**:10966–75.
- 508 Cardin JA, Palmer LA, Contreras D. 2007. Stimulus Feature Selectivity in Excitatory and Inhibitory  
509 Neurons in Primary Visual Cortex. *The Journal of Neuroscience* **27**:10333–10344.  
510 doi:10.1523/JNEUROSCI.1692-07.2007
- 511 Chichilnisky EJ. 2001. A simple white noise analysis of neuronal light. *Network: Computation in Neural*  
512 *Systems* **12**:199–213.
- 513 Crochet S, Poulet JFA, Kremer Y, Petersen CCH. 2011. Synaptic Mechanisms Underlying Sparse Coding

- 514 of Active Touch. *Neuron* **69**:1160–1175. doi:10.1016/j.neuron.2011.02.022
- 515 da Silva Lantyer A, Calcini N, Bijlsma A, Kole K, Emmelkamp M, Peeters M, Scheenen WJJ, Zeldenrust
- 516 F, Celikel T. 2018. A databank for intracellular electrophysiological mapping of the adult
- 517 somatosensory cortex. *GigaScience* **7**:1–9. doi:10.1093/gigascience/giy147
- 518 de Ruyter van Steveninck RR, Bialek W. 1988. Real-time performance of a movement-sensitive neuron
- 519 in the blowfly visual system: coding and information transfer in short spike sequences.
- 520 *Proceedings of the Royal Society of London Series B* **234**:379–414.
- 521 de Ruyter van Steveninck RR, Lewen GD, Strong SP, Koberle R, Bialek W. 1997. Reproducibility and
- 522 Variability in Neural Spike Trains. *Science* **275**:1805–1808. doi:10.1126/science.275.5307.1805
- 523 Denève S. 2008. Bayesian spiking neurons I: inference. *Neural Computation* **20**:91–117.
- 524 doi:10.1162/neco.2008.20.1.91
- 525 Denève S, Machens CK. 2016. Efficient codes and balanced networks. *Nature neuroscience* **19**:375–82.
- 526 doi:10.1038/nn.4243
- 527 Erisir A, Lau D, Rudy B, Leonard CS. 1999. Function of Specific K<sup>+</sup> Channels in Sustained High-
- 528 Frequency Firing of Fast-Spiking Neocortical Interneurons. *Journal of Neurophysiology*
- 529 **82**:2476–2489. doi:10.1152/jn.1999.82.5.2476
- 530 Földiák P. 1990. Forming sparse representations by local anti-Hebbian learning. *Biol Cybern* **64**:165–170.
- 531 Foldiak P, Endres D. 2008. Sparse Coding. *Scholarpedia* **3**:2984.
- 532 Fontaine B, Peña JL, Brette R. 2014. Spike-Threshold Adaptation Predicted by Membrane Potential
- 533 Dynamics In Vivo. *PLoS Computational Biology* **10**:1–11. doi:10.1371/journal.pcbi.1003560
- 534 Gerstner W, Naud R. 2009. How good are neuron models? *Science* **326**:379–80.
- 535 doi:10.1126/science.1181936
- 536 Griffen TC. 2014. GABAergic synapses: their plasticity and role in sensory cortex - See more at:
- 537 <http://journal.frontiersin.org/Journal/10.3389/fncel.2014.00091/abstract#sthash.15jGe6MC.dpuf>.
- 538 *Front Cell Neurosci* **8**.
- 539 Grissmer S, Nguyen AN, Aiyar J, Hanson DC, Mather RJ, Gutman GA, Karmilowicz MJ, Auperin DD,
- 540 George Chandy K. 1994. Pharmacological Characterization of Five Cloned Voltage-Gated
- 541 Expressed in Mammalian Cell Lines. *Molecular Pharmacology* **45**:1227–1234.
- 542 Gutkin BS, Zeldenrust F. 2014. Spike frequency adaptation. *Scholarpedia* **9**:30643.
- 543 doi:10.4249/scholarpedia.30643
- 544 Harris KD, Mrsic-Flogel TD. 2013. Cortical connectivity and sensory coding. *Nature* **503**:51–8.
- 545 doi:10.1038/nature12654
- 546 Hawkins J, Ahmad S. 2017. Why Neurons Have Thousands of Synapses, a Theory of Sequence Memory
- 547 in Neocortex. *Frontiers in neural circuits* **10**:1–13. doi:10.3389/fncir.2016.00023
- 548 Hofer SB, Ko H, Pichler B, Vogelstein JT, Ros H, Zeng H, Lein E, Lesica N a, Mrsic-Flogel TD. 2011.
- 549 Differential connectivity and response dynamics of excitatory and inhibitory neurons in visual
- 550 cortex. *Nature neuroscience* **14**:1045–1052. doi:10.1038/nn.2876
- 551 Huang C, Englitz B, Reznik A, Zeldenrust F, Tansu Celikel. 2020. Information transfer and recovery for
- 552 the sense of touch. *bioRxiv* doi:10.1101/2020.11.06.371658
- 553 Huang C, Resnik A, Celikel T, Englitz B. 2016. Adaptive Spike Threshold Enables Robust and
- 554 Temporally Precise Neuronal Encoding. *PLoS Computational Biology* **12**.
- 555 doi:10.1371/journal.pcbi.1004984
- 556 Isaacson JS, Scanziani M. 2011. How inhibition shapes cortical activity. *Neuron* **72**:231–43.
- 557 doi:10.1016/j.neuron.2011.09.027
- 558 Jolivet R, Lewis TJ, Gerstner W. 2004. Generalized integrate-and-fire models of neuronal activity
- 559 approximate spike trains of a detailed model to a high degree of accuracy. *Journal of*
- 560 *neurophysiology* **92**:959–76. doi:10.1152/jn.00190.2004
- 561 Ko H, Cossell L, Baragli C, Antolik J, Clopath C, Hofer SB, Mrsic-Flogel TD. 2013. The emergence of
- 562 functional microcircuits in visual cortex. *Nature* **496**:96–100. doi:10.1038/nature12015
- 563 Ko H, Hofer SB, Pichler B, Buchanan K a, Sjöström PJ, Mrsic-Flogel TD. 2011. Functional specificity of
- 564 local synaptic connections in neocortical networks. *Nature* **473**:87–91. doi:10.1038/nature09880

- 565 Koch C, Segev I. 2000. The role of single neurons in information processing. *Nature Neuroscience*  
566 **3**:1171–1177. doi:10.1038/81444
- 567 Kole MHP, Stuart GJ. 2012. Signal Processing in the Axon Initial Segment. *Neuron* **73**:235–247.  
568 doi:10.1016/j.neuron.2012.01.007
- 569 Lochmann T, Denève S. 2008. Information transmission with spiking Bayesian neurons. *New Journal of*  
570 *Physics* **10**:055019. doi:10.1088/1367-2630/10/5/055019
- 571 Markram H, Toledo-rodriguez M, Wang Y, Gupta A, Silberberg G, Wu C. 2004. Interneurons of the  
572 Neocortical Inhibitory System. *Nature reviews Neuroscience* **5**:793–807. doi:10.1038/nrn1519
- 573 Murray PD, Keller A. 2011. Somatosensory response properties of excitatory and inhibitory neurons in  
574 rat motor cortex. *J Neurophysiol* **106**:1355–1362.
- 575 Nowak LG, Sanchez-Vives MV, McCormick DA. 2008. Lack of orientation and direction selectivity in a  
576 subgroup of fast-spiking inhibitory interneurons: Cellular and synaptic mechanisms and  
577 comparison with other electrophysiological cell types. *Cerebral Cortex* **18**:1058–1078.  
578 doi:10.1093/cercor/bhm137
- 579 Okun M, Steinmetz N a., Cossell L, Iacaruso MF, Ko H, Barthó P, Moore T, Hofer SB, Mrcic-Flogel TD,  
580 Carandini M, Harris KD. 2015. Diverse coupling of neurons to populations in sensory cortex.  
581 *Nature* **521**:511–515. doi:10.1038/nature14273
- 582 Olshausen BA, Field DJ. 1996. Emergence of simple-cell receptive field properties by learning a sparse  
583 code for natural images. *Nature* **381**:607–609.
- 584 Paninski L. 2003. Convergence properties of three spike-triggered analysis techniques. *Network:*  
585 *Computation in Neural Systems* **14**:437–64.
- 586 Priebe NJ, Ferster D. 2008. Inhibition, Spike Threshold, and Stimulus Selectivity in Primary Visual  
587 Cortex. *Neuron* **57**:482–497. doi:10.1016/j.neuron.2008.02.005
- 588 Ranjbar-Slamloo Y, Arabzadeh E. 2019. Diverse tuning underlies sparse activity in layer 2/3 vibrissal  
589 cortex of awake mice. *Journal of Physiology* **597**:2803–2817. doi:10.1113/JP277506
- 590 Rauch A, La Camera G, Luscher H-R, Senn W, Fusi S. 2003. Neocortical pyramidal cells respond as  
591 integrate-and-fire neurons to in vivo-like input currents. *Journal of neurophysiology* **90**:1598–  
592 612. doi:10.1152/jn.00293.2003
- 593 Reyes-Puerta V, Kim S, Sun J, Imbrosci B, Kilb W. 2015. High Stimulus-Related Information in Barrel  
594 Cortex Inhibitory Interneurons. *PLoS Computational Biology* **11**:e1004121.  
595 doi:10.1371/journal.pcbi.1004121
- 596 Rieke F, Warland D, de Ruyter van Steveninck RR, Bialek W. 1997. Spikes: exploring the neural code.  
597 Cambridge, Massachusetts: MIT Press.
- 598 Rose D, Blakemore C. 1974. Effects of bicuculline on functions of inhibition in visual cortex. *Nature*  
599 **249**:375–377.
- 600 Rossant C, Goodman DFM, Fontaine B, Platkiewicz J, Magnusson AK, Brette R. 2011. Fitting neuron  
601 models to spike trains. *Frontiers in neuroscience* **5**:9. doi:10.3389/fnins.2011.00009
- 602 Rowan MJM, DelCanto G, Yu JJ, Kamasawa N, Christie JM. 2016. Synapse-Level Determination of  
603 Action Potential Duration by K(+) Channel Clustering in Axons. *Neuron* **91**:370–383.
- 604 Rowan MJM, Tranquil E, Christie JM. 2014. Distinct Kv channel subtypes contribute to differences in  
605 spike signaling properties in the axon initial segment and presynaptic boutons of cerebellar  
606 interneurons. *J Neurosci* **34**:6611–6623.
- 607 Rudy B, McBain CJ. 2001. Kv3 channels: voltage-gated K+ channels designed for high-frequency  
608 repetitive firing. *Trends Neurosci* **24**:517–526.
- 609 Sanchez-Vives MV, Nowak LG, McCormick D a. 2000. Cellular mechanisms of long-lasting adaptation  
610 in visual cortical neurons in vitro. *The Journal of Neuroscience* **20**:4286–4299. doi:20/11/4286  
611 [pii]
- 612 Sharpee TO, Rust NC, Bialek W. 2004. Analyzing neural responses to natural signals: maximally  
613 informative dimensions. *Neural Computation* **16**:223–250. doi:10.1162/089976604322742010
- 614 Simoncelli EP, Paninski L, Pillow JW, Schwartz O. 2004. Characterization of Neural Responses with  
615 Stochastic Stimuli In: Gazzaniga M, editor. *The Cognitive Neurosciences*. MIT Press. p. 1385.

- 616 Strong SP, Koberle R, de Ruyter van Steveninck RR, Bialek W. 1998. Entropy and Information in Neural  
617 Spike Trains. *Physical Review Letters* **80**:197–200.
- 618 Tan AYY, Brown BD, Scholl B, Mohanty D, Priebe NJ. 2011. Orientation Selectivity of Synaptic Input  
619 to Neurons in Mouse and Cat Primary Visual Cortex. *The Journal of Neuroscience* **31**:12339–  
620 12350. doi:10.1523/JNEUROSCI.2039-11.2011
- 621 Wu GK, Arbuckle R, Liu B hua, Tao HW, Zhang LI. 2008. Lateral Sharpening of Cortical Frequency  
622 Tuning by Approximately Balanced Inhibition. *Neuron* **58**:132–143.  
623 doi:10.1016/j.neuron.2008.01.035
- 624 Wu GK, Tao HW, Zhang LI. 2011. From elementary synaptic circuits to information processing in  
625 primary auditory cortex. *Neuroscience and Biobehavioral Reviews* **35**:2094–2104.  
626 doi:10.1016/j.neubiorev.2011.05.004
- 627 Zeldenrust F, de Knecht S, Wadman WJ, Denève S, Gutkin BS. 2017. Estimating the Information  
628 Extracted by a Single Spiking Neuron from a Continuous Input Time Series. *Frontiers in*  
629 *Computational Neuroscience* **11**:49. doi:0.3389/fncom.2017.00049
- 630 Zeldenrust F, Gutkin B, Denève S. 2019. Efficient and robust coding in heterogeneous recurrent  
631 networks. *bioRxiv*. doi:<https://doi.org/10.1101/804864>  
632



633 **Figures**

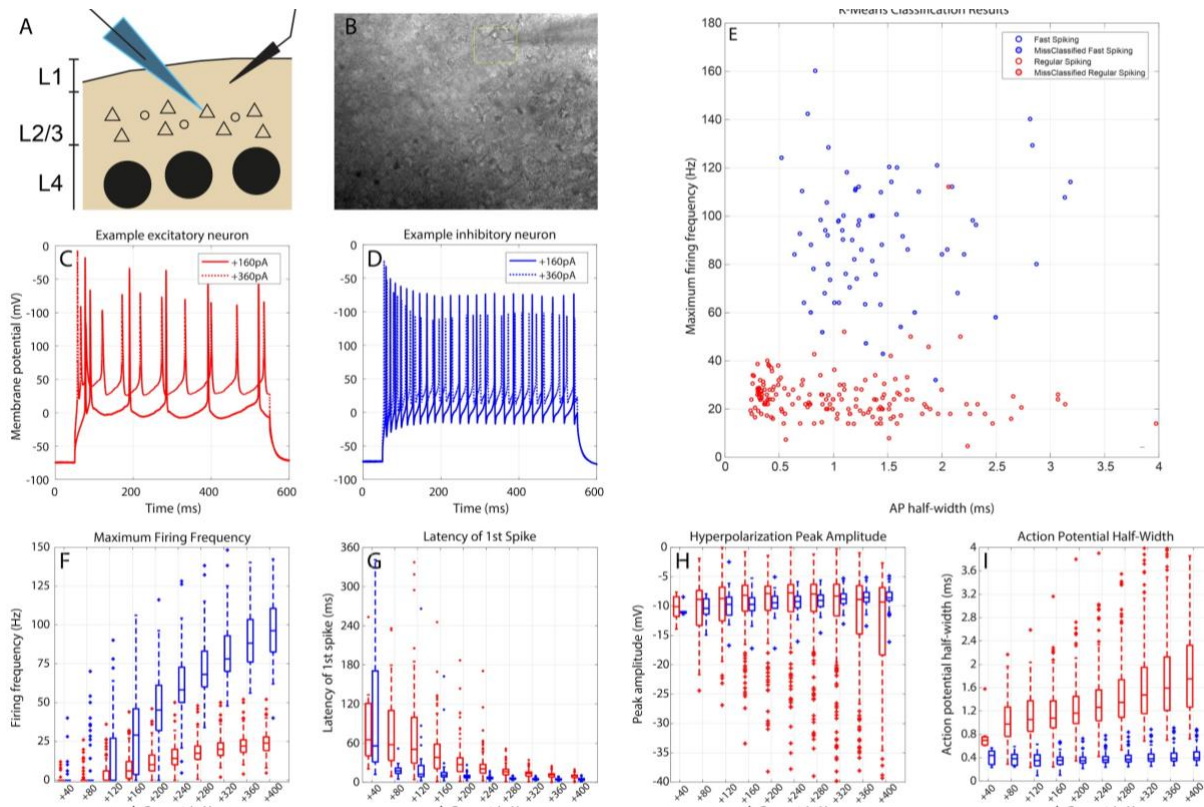

**Fig 1. Cell classification.** A, B) We selected neurons to record from the mouse somatosensory cortex (barrel cortex), in L2/3. Visually, the shape and size of soma were a good indicator of the cell type: smaller and roundish shapes would point towards fast spiking neurons, while slightly larger and triangular shapes would point to regular spiking (pyramidal) neurons. C) Example responses of an excitatory cell to a constant injected current. D) Example responses of an inhibitory cell to a constant injected current. E) Cell classification using agglomerative clustering based on the maximum firing frequency and spike width. Cells were classified as inhibitory (blue) when they had a small spike half-width combined with a high maximum firing rate, and as excitatory (red) with a large spike half-width and low maximum firing rate. There was one cell (pink star) in between the clusters, where the agglomerative clustering and the initial classification disagreed. This cell was classified as an inhibitory neuron (see Materials & Methods). F) Maximum firing frequency distribution for incremental current injection amplitudes for inhibitory (blue) and excitatory (red) neurons. G) Same as F), but for the latency of the first spike. H) After-hyperpolarization distribution. I) Spike half-width distribution. For threshold behaviour in the current-clamp step-and-hold protocol, see Supplementary Fig. S1.

634

635

636

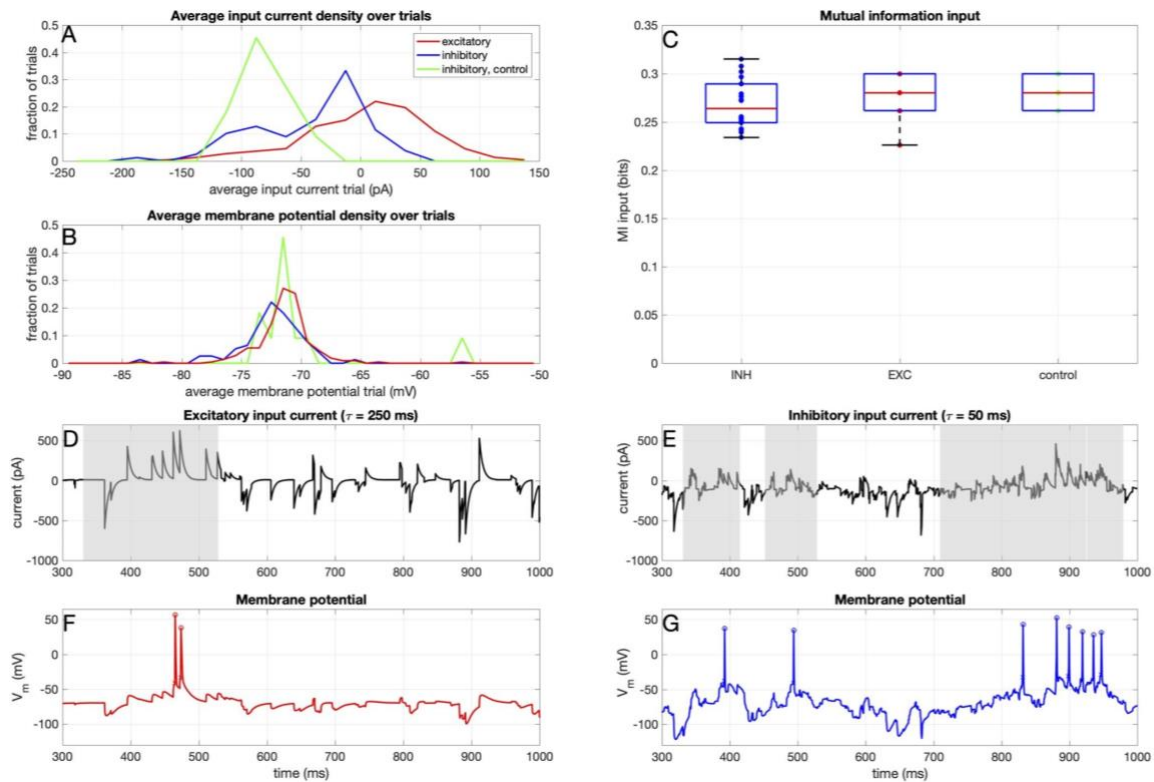

**Fig 2. Input.** A) Average (over the trial) input current and B) membrane potential for all trials. Green data points/lines denote the control experiments where the inhibitory neurons received the input current that was otherwise given to the excitatory neurons. C) Mutual information between the hidden state and the input current, for all trials. Note that because frozen noise was used, every frozen noise trial was actually the same. Therefore, there are not many different realizations and hence not many different MI values. D) Example injected frozen noise current for an excitatory neuron. The grey shaded area corresponds to times when the hidden state was 1. E) Example injected frozen noise current for an inhibitory neuron. F) Example resulting membrane potential of an excitatory neuron. G) Example resulting membrane potential of an inhibitory neuron.

637

638

639

640



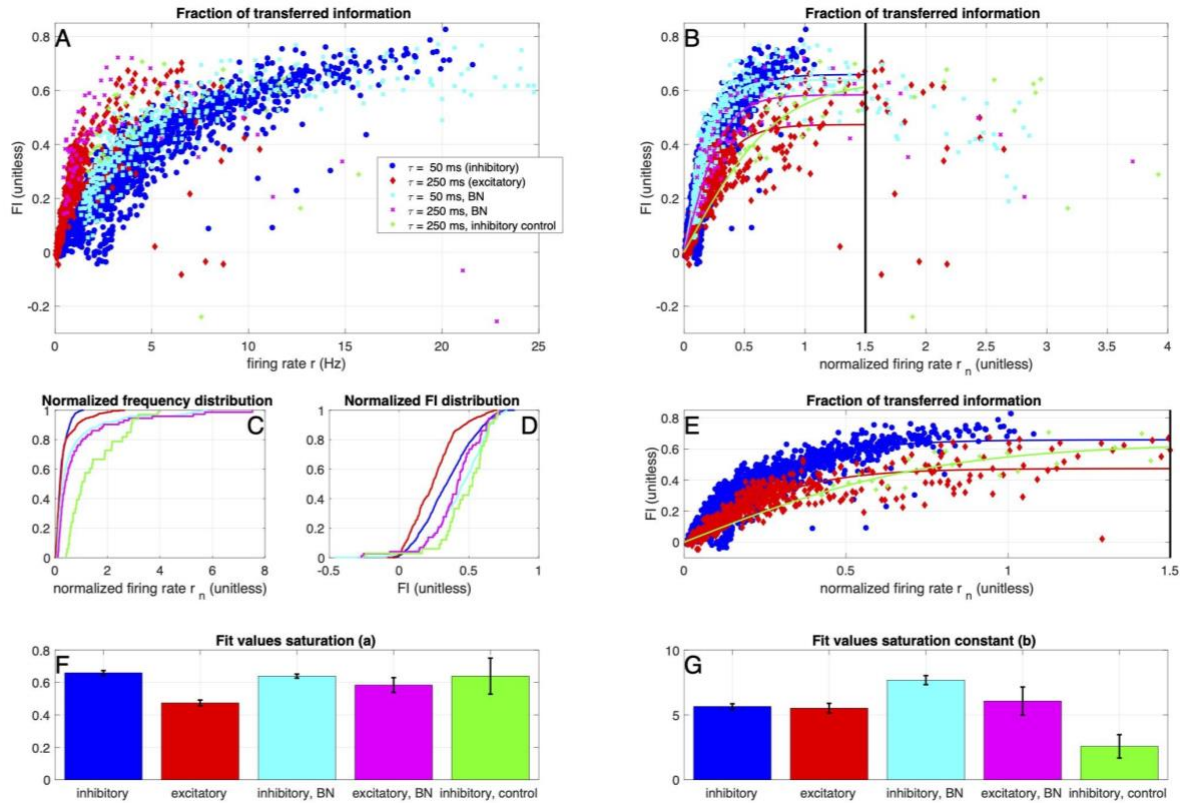

**Fig 3: Inhibitory neurons transfer more information.** A) Fraction of information kept during the spike generating process (FI, see eq. (1)) as a function of the firing rate, for inhibitory neurons (blue) and excitatory neurons (red). In green, the control experiments where the inhibitory neurons received the input current that was normally given to the excitatory neurons. In turquoise and pink, the simulations with the Bayesian Neuron Materials & Methods, see table 1 for parameter values and Supplementary Fig. S2 for simulation values). B) Fraction of information kept during the spike generating process (FI), as a function of the firing rate normalized by the switching speed of the hidden state (see table 1). The solid lines denote fits of the data up to a normalized firing frequency of  $r_n = 1.5$  (eq. (2)). Colors/markers the same as in A. C) and D) Normalized firing frequency and FI distribution of the spike trains in all conditions. E) Zoom of B). F) and G) Fit values and their 95% confidence intervals (error bars) for parameter a (F) and b (G). Data from 144 excitatory neurons (220 trials), 72 inhibitory neurons (78 trials) and 9 control inhibitory neurons (11 trials).

641

642

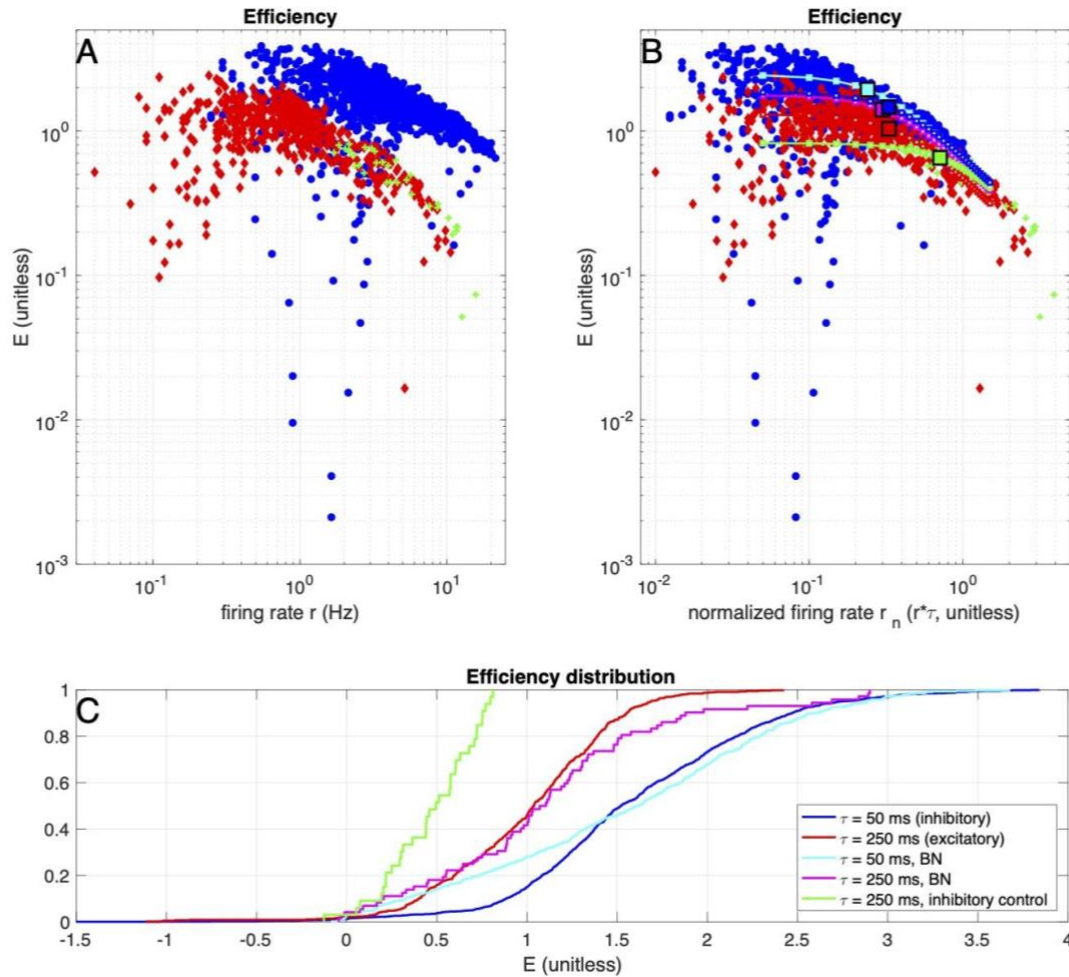

**Fig. 4 Inhibitory neurons transfer information more efficiently.** A) Efficiency  $E$  (eq. (3)) as a function of the firing rate, for inhibitory neurons (blue) and excitatory neurons (red). In green, the control experiments where the inhibitory neurons received the input current that was normally given to the excitatory neurons. B) Same as in A), but now as a function of the normalized firing rate. The lines with white squares denote the fitted curves from Fig 3B and their inflection points (large squares). The fitted values for the theoretical 'Bayesian neuron' (see Materials & Methods) are shown in pink and turquoise (parameter values: see table 1, simulation values: see Fig S1). C) Cumulative distribution of the efficiency  $E$ . Data from 144 excitatory neurons (220 trials), 72 inhibitory neurons (78 trials) and 9 control inhibitory neurons (11 trials). See also Supplementary Fig. S2 for data of simulations of the Bayesian Neuron.

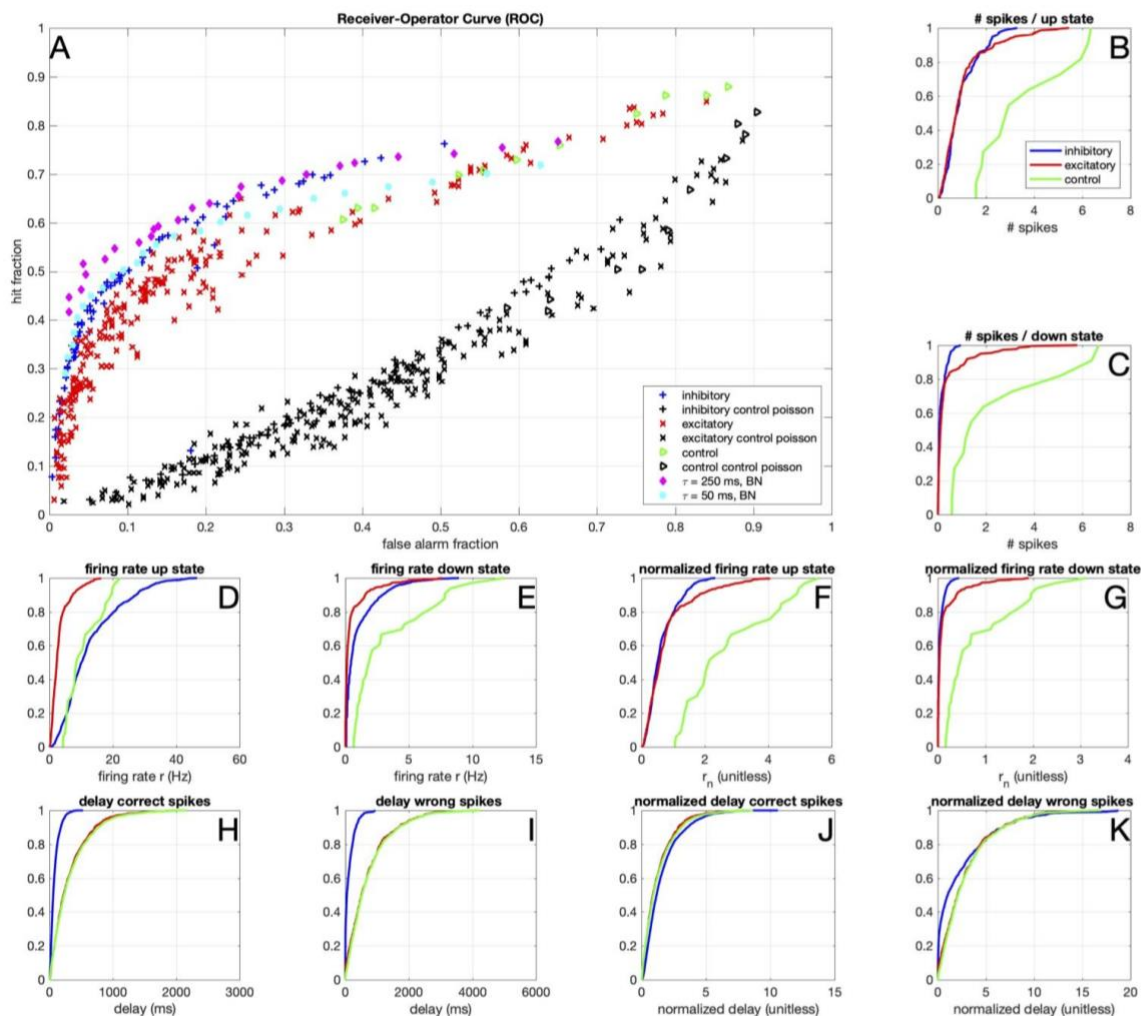

**Fig. 5 Binary classification.** A) Receiver Operator Curve (ROC), where the hit rate was defined as the fraction of up-states, in which at least 1 action potential was fired. Similarly, the false alarm rate was defined as the fraction of down-states, in which at least 1 action potential was fired. In black the results for Poisson spike trains with firing rates matched to those of the experimental/simulation conditions are shown. B) Distribution of the number of spikes per period where the hidden state was 1 (up state), for inhibitory neurons (blue) and excitatory neurons (red). C) Same as B), but for periods where the hidden state was 0 (down state). D) Firing rate  $r$  distribution in the up-state. E) Firing rate  $r$  distribution in the down-state.. F) Normalized firing rate  $r_n$  distribution in the up-state G) Normalized firing rate  $r_n$  distribution in the down-state. H) Delay (in ms) of each correct spike since the state switches from down to up. I) Delay (in ms) of each incorrect spike since the state switches from up to down. J) Normalized delay (delay/ $\tau$ , unitless) of each correct spike since the state switch from down to up. K) Normalized delay of each incorrect spike since the state switch from up to down. Results of hypotheses test for A-F are in Supplementary Table S2 and S3. Data from 144 excitatory neurons (220 trials), 72 inhibitory neurons (78 trials) and 9 control inhibitory neurons (11 trials).

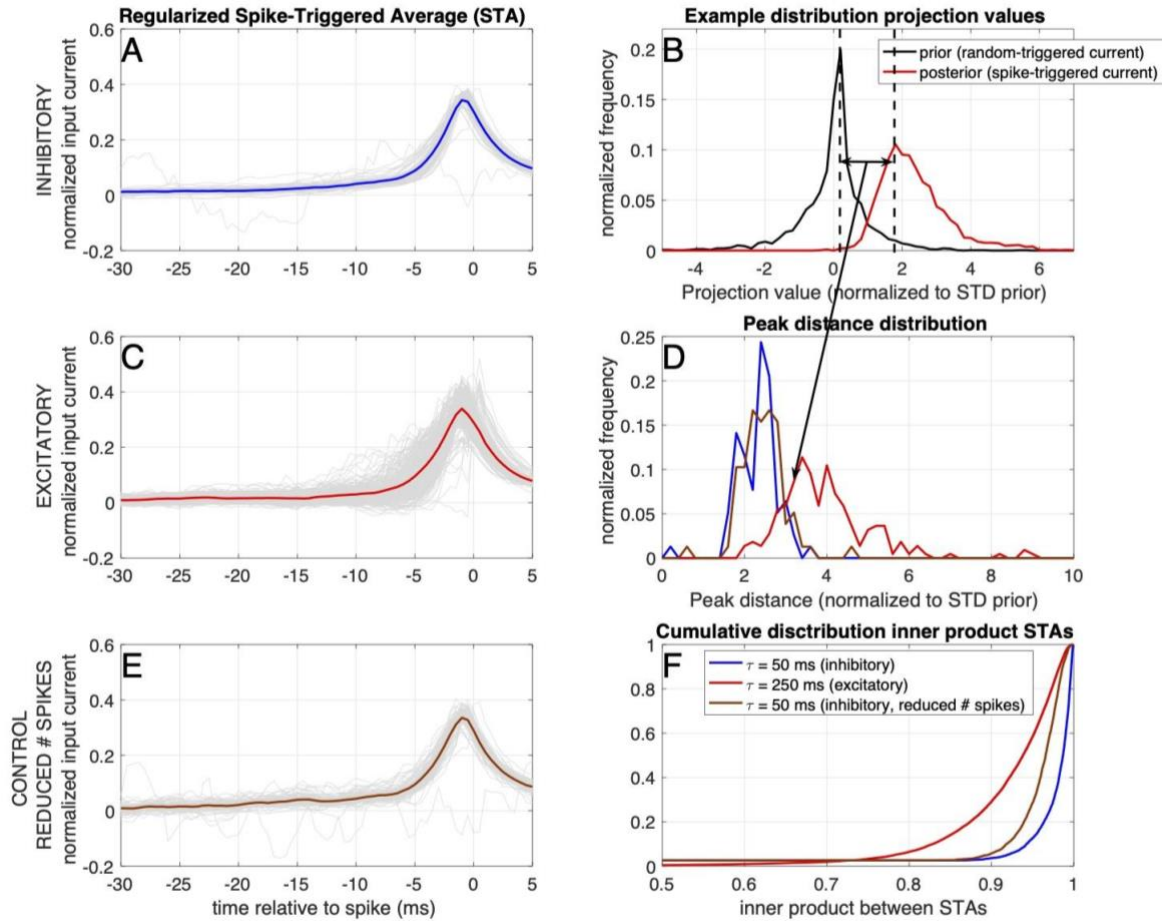

**Fig 6. Linear filtering properties.** A) Whiten and regularized (see Materials & Methods) spike-triggered average (STA) for inhibitory neurons. The STAs for individual neurons are shown as thin grey lines, and the average over neurons is shown as a thick coloured line. B) Example of a prior (random triggered, black line) and posterior (spike-triggered, blue line) distribution of stimulus projection values for a single inhibitory neuron. C) Same as A), but for excitatory neurons. D) Distribution of the differences between the means (see arrow in B) between the prior and posterior distribution over all neurons. E) Same as A), but for the reduced spike trains of the inhibitory neurons. F) Distribution of the inner products between the STAs for the three groups (note that because the STAs are normalized by the L2-norm, the maximal value of the inner product is limited to 1). Data from 144 excitatory neurons (220 trials) and 72 inhibitory neurons (78 trials).



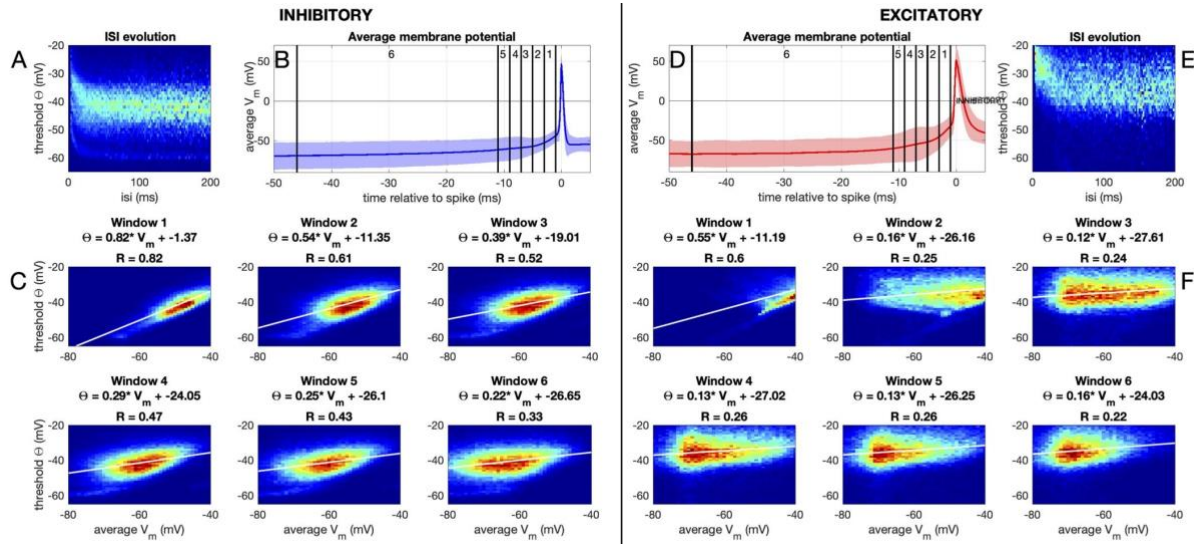

**Fig. 7 Dynamic threshold** A-C) Inhibitory neurons. D-F) Excitatory Neurons. A) Distribution of membrane potential threshold values (see Materials & Methods) for each inter-spike interval (ISI); normalized per ISI. B) Average spike shape (shaded region denotes standard deviation). Vertical lines denote the windows in C. C) Heatmap and regression for the relation between the threshold and the average membrane potential in the given window. D-F) Same as in A-C, but for excitatory neurons. This is all in the Frozen Noise protocol, for threshold behaviour in the current-clamp step-and-hold protocol, see Supplementary Fig. S1.

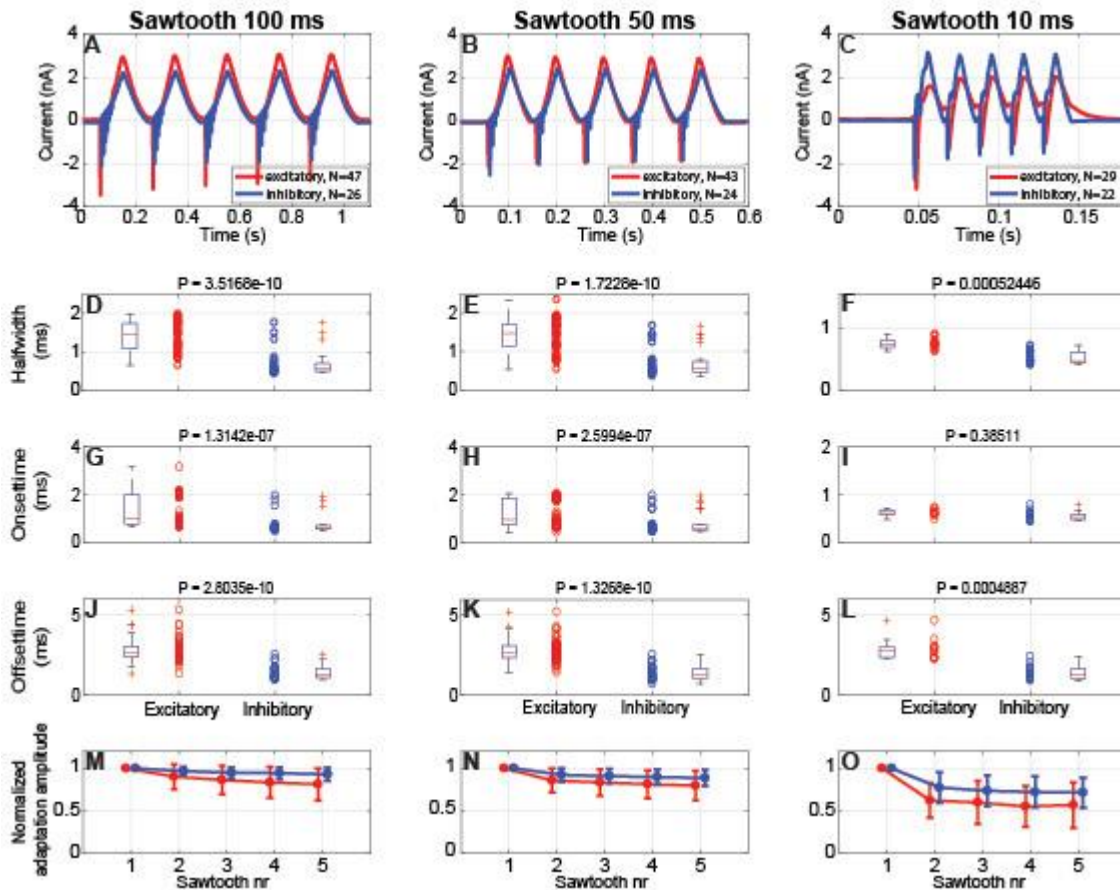

**Fig. 8 Voltage clamp sawtooth** Sawtooth voltage clamp experiments, where the clamped membrane potential was shifted linearly from -70 mV to +70 mV in 100 ms (left column), 50 ms (middle column) and 10 ms (right column). A-C: Example traces. D-F: Halfwidth of the first peak. G-I: Onset Time calculated by measuring the time between initiation and the maximum amplitude of the first peak. For G and H we reported the p-value for completeness, but a Kolomogorov-Smirnov test results in a relevant non-gaussianity of the distributions. J-L: Offset Time calculated by measuring the time between maximum amplitude and conclusion of the peak. M-O:Adaptation of the amplitude of the first peak for each sawtooth, compared between consecutive sawtooths (for statistical comparison, see Supplementary Table S4). All statistics displayed are computed with 2-sample t-test. Supplementary Fig. S4 shows the amplitude, initiation voltage and latency of the first peak.
